# Supplementary material for: Sustained YAP1 activation induces DNA demethylation that promotes the development of hepatocellular carcinomas lacking driver gene mutations
Source: Research Square preprint supplement (doi:10.21203/rs.3.rs-7250110/v1), 2025-08-22
Supplement: Supplementary file 1 [file 21f9f027139fa1c7417940b5.pdf]

**Table1. Incidence of liver cancer in mice induced by transfection of plasmids expressing YAP1, K-Ras or v-Src.**

| Strain   | Gene name | Type               | Sex    | Number of mice bearing Liver Tumors |          |          |          |           |
|----------|-----------|--------------------|--------|-------------------------------------|----------|----------|----------|-----------|
|          |           |                    |        | 3 months                            | 4 months | 5 months | 6 months | 12 months |
| C57BL/6J | YAP       | WT                 | Male   | 0/3                                 | 0/3      | 0/3      | 0/10     | 0/3       |
|          |           | 1SA                | Male   | 0/3                                 | 0/3      | 0/3      | 0/3      | 0/3       |
|          |           | 2SA                | Male   | 3/5                                 | 4/5      | 3/5      | 3/3      | -         |
|          |           | 5SA                | Male   | 1/6                                 | 2/5      | 4/5      | 9/10     | -         |
|          |           | 5SA/WW1,2*         | Male   | 3/3                                 | 5/5      | 5/5      | 5/5      | -         |
|          |           | 5SA/ $\Delta$ C    | Male   | 0/3                                 | -        | -        | 0/5      | -         |
|          |           | 5SA/TEAD*          | Male   | 0/3                                 | 0/3      | 0/3      | 0/9      | -         |
|          |           | 2SA                | Female | 0/5                                 | 0/3      | 1/3      | 1/3      | -         |
|          | K-Ras     | G12V               | Male   | -                                   | -        | -        | 1/11     | -         |
|          | v-Src     | Rous sarcoma virus | Male   | -                                   | -        | -        | 0/9      | -         |
|          | LacZ      | WT                 | Male   | 0/3                                 | 0/3      | 0/3      | 0/6      | 0/3       |
