# Supplementary material for: Sustained YAP1 activation induces DNA demethylation that promotes the development of hepatocellular carcinomas lacking driver gene mutations
Source: Research Square preprint supplement (doi:10.21203/rs.3.rs-7250110/v1), 2025-08-22
Supplement: Supplementary file 2 [file 754d1d99518e3e2d3625bd83.pdf]

- Supplementary Table 1: RNA-seq data (Control vs Non-Tumor vs HCC)
- Supplementary Table 2: Tumor specific genes detected by DRAGEN Bio-IT Platform in WES (Non-Tumor\_1 vs HCC\_1)
- Supplementary Table 3: Tumor specific genes detected by DRAGEN Bio-IT Platform in WES (Non-Tumor\_2 vs HCC\_2)
- Supplementary Table 4: Tumor specific genes detected by DRAGEN Bio-IT Platform in WES (Non-Tumor\_3 vs HCC\_3)
- Supplementary Table 5: Tumor specific genes detected by DRAGEN Bio-IT Platform in WES (Non-Tumor\_4 vs HCC\_4)
- Supplementary Table 6: Tumor specific genes detected by DRAGEN Bio-IT Platform in WES (Non-Tumor\_5 vs HCC\_5\_1)
- Supplementary Table 7: Tumor specific genes detected by DRAGEN Bio-IT Platform in WES (Non-Tumor\_5 vs HCC\_5\_2)
- Supplementary Table 8: Serection of cancer related genes of WES genes
- Supplementary Table 9: RRBS data (Non-Tumor vs HCC)
- Supplementary Table 10: Serection of cancer related genes of DNA demethylated genes
- Supplementary Table 11: Depth and Sequencing saturation of Visium HD analysis
- Supplementary Table 12: List of antibodies
- Supplementary Table 13: List of primers
