# Supplementary material for: Sustained YAP1 activation induces DNA demethylation that promotes the development of hepatocellular carcinomas lacking driver gene mutations
Source: Research Square preprint supplement (doi:10.21203/rs.3.rs-7250110/v1), 2025-08-22
Supplement: Supplementary file 3 [file 9b3b16fe595ad02fa4aacf0b.pdf]

Before additional sequencing

| Sample ID | Contig 1 |  | Contig 2 |  | Contig 3 |  | Contig 4 |  | Contig 5 |  | Contig 6 |  | Contig 7 |  | Contig 8 |  | Contig 9 |  | Contig 10 |  | Contig 11 |  | Contig 12 |  | Contig 13 |  | Contig 14 |  | Contig 15 |  | Contig 16 |  | Contig 17 |  | Contig 18 |  | Contig 19 |  | Contig 20 |  | Contig 21 |  | Contig 22 |  | Contig 23 |  | Contig 24 |  | Contig 25 |  | Contig 26 |  | Contig 27 |  | Contig 28 |  | Contig 29 |  | Contig 30 |  | Contig 31 |  | Contig 32 |  | Contig 33 |  | Contig 34 |  | Contig 35 |  | Contig 36 |  | Contig 37 |  | Contig 38 |  | Contig 39 |  | Contig 40 |  | Contig 41 |  | Contig 42 |  | Contig 43 |  | Contig 44 |  | Contig 45 |  | Contig 46 |  | Contig 47 |  | Contig 48 |  | Contig 49 |  | Contig 50 |  | Contig 51 |  | Contig 52 |  | Contig 53 |  | Contig 54 |  | Contig 55 |  | Contig 56 |  | Contig 57 |  | Contig 58 |  | Contig 59 |  | Contig 60 |  | Contig 61 |  | Contig 62 |  | Contig 63 |  | Contig 64 |  | Contig 65 |  | Contig 66 |  | Contig 67 |  | Contig 68 |  | Contig 69 |  | Contig 70 |  | Contig 71 |  | Contig 72 |  | Contig 73 |  | Contig 74 |  | Contig 75 |  | Contig 76 |  | Contig 77 |  | Contig 78 |  | Contig 79 |  | Contig 80 |  | Contig 81 |  | Contig 82 |  | Contig 83 |  | Contig 84 |  | Contig 85 |  | Contig 86 |  | Contig 87 |  | Contig 88 |  | Contig 89 |  | Contig 90 |  | Contig 91 |  | Contig 92 |  | Contig 93 |  | Contig 94 |  | Contig 95 |  | Contig 96 |  | Contig 97 |  | Contig 98 |  | Contig 99 |  | Contig 100 |  | Contig 101 |  | Contig 102 |  | Contig 103 |  | Contig 104 |  | Contig 105 |  | Contig 106 |  | Contig 107 |  | Contig 108 |  | Contig 109 |  | Contig 110 |  | Contig 111 |  | Contig 112 |  | Contig 113 |  | Contig 114 |  | Contig 115 |  | Contig 116 |  | Contig 117 |  | Contig 118 |  | Contig 119 |  | Contig 120 |  | Contig 121 |  | Contig 122 |  | Contig 123 |  | Contig 124 |  | Contig 125 |  | Contig 126 |  | Contig 127 |  | Contig 128 |  | Contig 129 |  | Contig 130 |  | Contig 131 |  | Contig 132 |  | Contig 133 |  | Contig 134 |  | Contig 135 |  | Contig 136 |  | Contig 137 |  | Contig 138 |  | Contig 139 |  | Contig 140 |  | Contig 141 |  | Contig 142 |  | Contig 143 |  | Contig 144 |  | Contig 145 |  | Contig 146 |  | Contig 147 |  | Contig 148 |  | Contig 149 |  | Contig 150 |  | Contig 151 |  | Contig 152 |  | Contig 153 |  | Contig 154 |  | Contig 155 |  | Contig 156 |  | Contig 157 |  | Contig 158 |  | Contig 159 |  | Contig 160 |  | Contig 161 |  | Contig 162 |  | Contig 163 |  | Contig 164 |  | Contig 165 |  | Contig 166 |  | Contig 167 |  | Contig 168 |  | Contig 169 |  | Contig 170 |  | Contig 171 |  | Contig 172 |  | Contig 173 |  | Contig 174 |  | Contig 175 |  | Contig 176 |  | Contig 177 |  | Contig 178 |  | Contig 179 |  | Contig 180 |  | Contig 181 |  | Contig 182 |  | Contig 183 |  | Contig 184 |  | Contig 185 |  | Contig 186 |  | Contig 187 |  | Contig 188 |  | Contig 189 |  | Contig 190 |  | Contig 191 |  | Contig 192 |  | Contig 193 |  | Contig 194 |  | Contig 195 |  | Contig 196 |  | Contig 197 |  | Contig 198 |  | Contig 199 |  | Contig 200 |  | Contig 201 |  | Contig 202 |  | Contig 203 |  | Contig 204 |  | Contig 205 |  | Contig 206 |  | Contig 207 |  | Contig 208 |  | Contig 209 |  | Contig 210 |  | Contig 211 |  | Contig 212 |  | Contig 213 |  | Contig 214 |  | Contig 215 |  | Contig 216 |  | Contig 217 |  | Contig 218 |  | Contig 219 |  | Contig 220 |  | Contig 221 |  | Contig 222 |  | Contig 223 |  | Contig 224 |  | Contig 225 |  | Contig 226 |  | Contig 227 |  | Contig 228 |  | Contig 229 |  | Contig 230 |  | Contig 231 |  | Contig 232 |  | Contig 233 |  | Contig 234 |  | Contig 235 |  | Contig 236 |  | Contig 237 |  | Contig 238 |  | Contig 239 |  | Contig 240 |  | Contig 241 |  | Contig 242 |  | Contig 243 |  | Contig 244 |  | Contig 245 |  | Contig 246 |  | Contig 247 |  | Contig 248 |  | Contig 249 |  | Contig 250 |  | Contig 251 |  | Contig 252 |  | Contig 253 |  | Contig 254 |  | Contig 255 |  | Contig 256 |  | Contig 257 |  | Contig 258 |  | Contig 259 |  | Contig 260 |  | Contig 261 |  | Contig 262 |  | Contig 263 |  | Contig 264 |  | Contig 265 |  | Contig 266 |  | Contig 267 |  | Contig 268 |  | Contig 269 |  | Contig 270 |  | Contig 271 |  | Contig 272 |  | Contig 273 |  | Contig 274 |  | Contig 275 |  | Contig 276 |  | Contig 277 |  | Contig 278 |  | Contig 279 |  | Contig 280 |  | Contig 281 |  | Contig 282 |  | Contig 283 |  | Contig 284 |  | Contig 285 |  | Contig 286 |  | Contig 287 |  | Contig 288 |  | Contig 289 |  | Contig 290 |  | Contig 291 |  | Contig 292 |  | Contig 293 |  | Contig 294 |  | Contig 295 |  | Contig 296 |  | Contig 297 |  | Contig 298 |  | Contig 299 |  | Contig 300 |  | Contig 301 |  | Contig 302 |  | Contig 303 |  | Contig 304 |  | Contig 305 |  | Contig 306 |  | Contig 307 |  | Contig 308 |  | Contig 309 |  | Contig 310 |  | Contig 311 |  | Contig 312 |  | Contig 313 |  | Contig 314 |  | Contig 315 |  | Contig 316 |  | Contig 317 |  | Contig 318 |  | Contig 319 |  | Contig 320 |  | Contig 321 |  | Contig 322 |  | Contig 323 |  | Contig 324 |  | Contig 325 |  | Contig 326 |  | Contig 327 |  | Contig 328 |  | Contig 329 |  | Contig 330 |  | Contig 331 |  | Contig 332 |  | Contig 333 |  | Contig 334 |  | Contig 335 |  | Contig 336 |  | Contig 337 |  | Contig 338 |  | Contig 339 |  | Contig 340 |  | Contig 341 |  | Contig 342 |  | Contig 343 |  | Contig 344 |  | Contig 345 |  | Contig 346 |  | Contig 347 |  | Contig 348 |  | Contig 349 |  | Contig 350 |  | Contig 351 |  | Contig 352 |  | Contig 353 |  | Contig 354 |  | Contig 355 |  | Contig 356 |  | Contig 357 |  | Contig 358 |  | Contig 359 |  | Contig 360 |  | Contig 361 |  | Contig 362 |  | Contig 363 |  | Contig 364 |  | Contig 365 |  | Contig 366 |  | Contig 367 |  | Contig 368 |  | Contig 369 |  | Contig 370 |  | Contig 371 |  | Contig 372 |  | Contig 373 |  | Contig 374 |  | Contig 375 |  | Contig 376 |  | Contig 377 |  | Contig 378 |  | Contig 379 |  | Contig 380 |  | Contig 381 |  | Contig 382 |  | Contig 383 |  | Contig 384 |  | Contig 385 |  | Contig 386 |  | Contig 387 |  | Contig 388 |  | Contig 389 |  | Contig 390 |  | Contig 391 |  | Contig 392 |  | Contig 393 |  | Contig 394 |  | Contig 395 |  | Contig 396 |  | Contig 397 |  | Contig 398 |  | Contig 399 |  | Contig 400 |  | Contig 401 |  | Contig 402 |  | Contig 403 |  | Contig 404 |  | Contig 405 |  | Contig 406 |  | Contig 407 |  | Contig 408 |  | Contig 409 |  | Contig 410 |  | Contig 411 |  | Contig 412 |  | Contig 413 |  | Contig 414 |  | Contig 415 |  | Contig 416 |  | Contig 417 |  | Contig 418 |  | Contig 419 |  | Contig 420 |  | Contig 421 |  | Contig 422 |  | Contig 423 |  | Contig 424 |  | Contig 425 |  | Contig 426 |  | Contig 427 |  | Contig 428 |  | Contig 429 |  | Contig 430 |  | Contig 431 |  | Contig 432 |  | Contig 433 |  | Contig 434 |  | Contig 435 |  | Contig 436 |  | Contig 437 |  | Contig 438 |  | Contig 439 |  | Contig 440 |  | Contig 441 |  | Contig 442 |  | Contig 443 |  | Contig 444 |  | Contig 445 |  | Contig 446 |  | Contig 447 |  | Contig 448 |  | Contig 449 |  | Contig 450 |  | Contig 451 |  | Contig 452 |  | Contig 453 |  | Contig 454 |  | Contig 455 |  | Contig 456 |  | Contig 457 |  | Contig 458 |  | Contig 459 |  | Contig 460 |  | Contig 461 |  | Contig 462 |  | Contig 463 |  | Contig 464 |  | Contig 465 |  | Contig 466 |  | Contig 467 |  | Contig 468 |  | Contig 469 |  | Contig 470 |  | Contig 471 |  | Contig 472 |  | Contig 473 |  | Contig 474 |  | Contig 475 |  | Contig 476 |  | Contig 477 |  | Contig 478 |  | Contig 479 |  | Contig 480 |  | Contig 481 |  | Contig 482 |  | Contig 483 |  | Contig 484 |  | Contig 485 |  | Contig 486 |  | Contig 487 |  | Contig 488 |  | Contig 489 |  | Contig 490 |  | Contig 491 |  | Contig 492 |  | Contig 493 |  | Contig 494 |  | Contig 495 |  | Contig 496 |  | Contig 497 |  | Contig 498 |  | Contig 499 |  | Contig 500 |  | Contig 501 |  | Contig 502 |  | Contig 503 |  | Contig 504 |  | Contig 505 |  | Contig 506 |  | Contig 507 |  | Contig 508 |  | Contig 509 |  | Contig 510 |  | Contig 511 |  | Contig 512 |  | Contig 513 |  | Contig 514 |  | Contig 515 |  | Contig 516 |  | Contig 517 |  | Contig 518 |  | Contig 519 |  | Contig 520 |  | Contig 521 |  | Contig 522 |  | Contig 523 |  | Contig 524 |  | Contig 525 |  | Contig 526 |  | Contig 527 |  | Contig 528 |  | Contig 529 |  | Contig 530 |  | Contig 531 |  | Contig 532 |  | Contig 533 |  | Contig 534 |  | Contig 535 |  | Contig 536 |  | Contig 537 |  | Contig 538 |  | Contig 539 |  | Contig 540 |  | Contig 541 |  | Contig 542 |  | Contig 543 |  | Contig 544 |  | Contig 545 |  | Contig 546 |  | Contig 547 |  | Contig 548 |  | Contig 549 |  | Contig 550 |  | Contig 551 |  | Contig 552 |  | Contig 553 |  | Contig 554 |  | Contig 555 |  | Contig 556 |  | Contig 557 |  | Contig 558 |  | Contig 559 |  | Contig 560 |  | Contig 561 |  | Contig 562 |  | Contig 563 |  | Contig 564 |  | Contig 565 |  | Contig 566 |  | Contig 567 |  | Contig 568 |  | Contig 569 |  | Contig 570 |  | Contig 571 |  | Contig 572 |  | Contig 573 |  | Contig 574 |  | Contig 575 |  | Contig 576 |  | Contig 577 |  | Contig 578 |  | Contig 579 |  | Contig 580 |  | Contig 581 |  | Contig 582 |  | Contig 583 |  | Contig 584 |  | Contig 585 |  | Contig 586 |  | Contig 587 |  | Contig 588 |  | Contig 589 |  | Contig 590 |  | Contig 591 |  | Contig 592 |  | Contig 593 |  | Contig 594 |  | Contig 595 |  | Contig 596 |  | Contig 597 |  | Contig 598 |  | Contig 599 |  | Contig 600 |  | Contig 601 |  | Contig 602 |  | Contig 603 |  | Contig 604 |  | Contig 605 |  | Contig 606 |  | Contig 607 |  | Contig 608 |  | Contig 609 |  | Contig 610 |  | Contig 611 |  | Contig 612 |  | Contig 613 |  | Contig 614 |  | Contig 615 |  | Contig 616 |  | Contig 617 |  | Contig 618 |  | Contig 619 |  | Contig 620 |  | Contig 621 |  | Contig 622 |  | Contig 623 |  | Contig 624 |  | Contig 625 |  | Contig 626 |  | Contig 627 |  | Contig 628 |  | Contig 629 |  | Contig 630 |  | Contig 631 |  | Contig 632 |  | Contig 633 |  | Contig 634 |  | Contig 635 |  | Contig 636 |  | Contig 637 |  | Contig 638 |  | Contig 639 |  | Contig 640 |  | Contig 641 |  | Contig 642 |  | Contig 643 |  | Contig 644 |  | Contig 645 |  | Contig 646 |  | Contig 647 |  | Contig 648 |  | Contig 649 |  | Contig 650 |  | Contig 651 |  | Contig 652 |  | Contig 653 |  | Contig 654 |  | Contig 655 |  | Contig 656 |  | Contig 657 |  | Contig 658 |  | Contig 659 |  | Contig 660 |  | Contig 661 |  | Contig 662 |  | Contig 663 |  | Contig 664 |  | Contig 665 |  | Contig 666 |  | Contig 667 |  | Contig 668 |  | Contig 669 |  | Contig 670 |  | Contig 671 |  | Contig 672 |  | Contig 673 |  | Contig 674 |  | Contig 675 |  | Contig 676 |  | Contig 677 |  | Contig 678 |  | Contig 679 |  | Contig 680 |  | Contig 681 |  | Contig 682 |  | Contig 683 |  | Contig 684 |  | Contig 685 |  | Contig 686 |  | Contig 687 |  | Contig 688 |  | Contig 689 |  | Contig 690 |  | Contig 691 |  | Contig 692 |  | Contig 693 |  | Contig 694 |  | Contig 695 |  | Contig 696 |  | Contig 697 |  | Contig 698 |  | Contig 699 |  | Contig 700 |  | Contig 701 |  | Contig 702 |  | Contig 703 |  | Contig 704 |  | Contig 705 |  | Contig 706 |  | Contig 707 |  | Contig 708 |  | Contig 709 |  | Contig 710 |  | Contig 711 |  | Contig 712 |  | Contig 713 |  | Contig 714 |  | Contig 715 |  | Contig 716 |  | Contig 717 |  | Contig 718 |  | Contig 719 |  | Contig 720 |  | Contig 721 |  | Contig 722 |  | Contig 723 |  | Contig 724 |  | Contig 725 |  | Contig 726 |  | Contig 727 |  | Contig 728 |  | Contig 729 |  | Contig 730 |  | Contig 731 |  | Contig 732 |  | Contig 733 |  | Contig 734 |  | Contig 735 |  | Contig 736 |  | Contig 737 |  | Contig 738 |  | Contig 739 |  | Contig 740 |  | Contig 741 |  | Contig 742 |  | Contig 743 |  | Contig 744 |  | Contig 745 |  | Contig 746 |  | Contig 747 |  | Contig 748 |  | Contig 749 |  | Contig 750 |  | Contig 751 |  | Contig 752 |  | Contig 753 |  | Contig 754 |  | Contig 755 |  | Contig 756 |  | Contig 757 |  | Contig 758 |  | Contig 759 |  | Contig 760 |  | Contig 761 |  | Contig 762 |  | Contig 763 |  | Contig 764 |  | Contig 765 |  | Contig 766 |  | Contig 767 |  | Contig 768 |  | Contig 769 |  | Contig 770 |  | Contig 771 |  | Contig 772 |  | Contig 773 |  | Contig 774 |  | Contig 775 |  | Contig 776 |  | Contig 777 |  | Contig 778 |  | Contig 779 |  | Contig 780 |  | Contig 781 |  | Contig 782 |  | Contig 783 |  | Contig 784 |  | Contig 785 |  | Contig 786 |  | Contig 787 |  | Contig 788 |  | Contig 789 |  | Contig 790 |  | Contig 791 |  | Contig 792 |  | Contig 793 |  | Contig 794 |  | Contig 795 |  | Contig 796 |  | Contig 797 |  | Contig 798 |  | Contig 799 |  | Contig 800 |  | Contig 801 |  | Contig 802 |  | Contig 803 |  | Contig 804 |  | Contig 805 |  | Contig 806 |  | Contig 807 |  | Contig 808 |  | Contig 809 |  | Contig 810 |  | Contig 811 |  | Contig 812 |  | Contig 813 |  | Contig 814 |  | Contig 815 |  | Contig 816 |  | Contig 817 |  | Contig 818 |  | Contig 819 |  | Contig 820 |  | Contig 821 |  | Contig 822 |  | Contig 823 |  | Contig 824 |  | Contig 825 |  | Contig 826 |  | Contig 827 |  | Contig 828 |  | Contig 829 |  | Contig 830 |  | Contig 831 |  | Contig 832 |  | Contig 833 |  | Contig 834 |  | Contig 835 |  | Contig 836 |  | Contig 837 |  | Contig 838 |  | Contig 839 |  | Contig 840 |  | Contig 841 |  | Contig 842 |  | Contig 843 |  | Contig 844 |  | Contig 845 |  | Contig 846 |  | Contig 847 |  | Contig 848 |  | Contig 849 |  | Contig 850 |  | Contig 851 |  | Contig 852 |  | Contig 853 |  | Contig 854 |  | Contig 855 |  | Contig 856 |  | Contig 857 |  | Contig 858 |  | Contig 859 |  | Contig 860 |  | Contig 861 |  | Contig 862 |  | Contig 863 |  | Contig 864 |  | Contig 865 |  | Contig 866 |  | Contig 867 |  | Contig 868 |  | Contig 869 |  | Contig 870 |  | Contig 871 |  | Contig 872 |  | Contig 873 |  | Contig 874 |  | Contig 875 |  | Contig 876 |  | Contig 877 |  | Contig 878 |  | Contig 879 |  | Contig 880 |  | Contig 881 |  | Contig 882 |  | Contig 883 |  | Contig 884 |  | Contig 885 |  | Contig 886 |  | Contig 887 |  | Contig 888 |  | Contig 889 |  | Contig 890 |  | Contig 891 |  |
|-----------|----------|--|----------|--|----------|--|----------|--|----------|--|----------|--|----------|--|----------|--|----------|--|-----------|--|-----------|--|-----------|--|-----------|--|-----------|--|-----------|--|-----------|--|-----------|--|-----------|--|-----------|--|-----------|--|-----------|--|-----------|--|-----------|--|-----------|--|-----------|--|-----------|--|-----------|--|-----------|--|-----------|--|-----------|--|-----------|--|-----------|--|-----------|--|-----------|--|-----------|--|-----------|--|-----------|--|-----------|--|-----------|--|-----------|--|-----------|--|-----------|--|-----------|--|-----------|--|-----------|--|-----------|--|-----------|--|-----------|--|-----------|--|-----------|--|-----------|--|-----------|--|-----------|--|-----------|--|-----------|--|-----------|--|-----------|--|-----------|--|-----------|--|-----------|--|-----------|--|-----------|--|-----------|--|-----------|--|-----------|--|-----------|--|-----------|--|-----------|--|-----------|--|-----------|--|-----------|--|-----------|--|-----------|--|-----------|--|-----------|--|-----------|--|-----------|--|-----------|--|-----------|--|-----------|--|-----------|--|-----------|--|-----------|--|-----------|--|-----------|--|-----------|--|-----------|--|-----------|--|-----------|--|-----------|--|-----------|--|-----------|--|-----------|--|-----------|--|-----------|--|-----------|--|-----------|--|-----------|--|-----------|--|------------|--|------------|--|------------|--|------------|--|------------|--|------------|--|------------|--|------------|--|------------|--|------------|--|------------|--|------------|--|------------|--|------------|--|------------|--|------------|--|------------|--|------------|--|------------|--|------------|--|------------|--|------------|--|------------|--|------------|--|------------|--|------------|--|------------|--|------------|--|------------|--|------------|--|------------|--|------------|--|------------|--|------------|--|------------|--|------------|--|------------|--|------------|--|------------|--|------------|--|------------|--|------------|--|------------|--|------------|--|------------|--|------------|--|------------|--|------------|--|------------|--|------------|--|------------|--|------------|--|------------|--|------------|--|------------|--|------------|--|------------|--|------------|--|------------|--|------------|--|------------|--|------------|--|------------|--|------------|--|------------|--|------------|--|------------|--|------------|--|------------|--|------------|--|------------|--|------------|--|------------|--|------------|--|------------|--|------------|--|------------|--|------------|--|------------|--|------------|--|------------|--|------------|--|------------|--|------------|--|------------|--|------------|--|------------|--|------------|--|------------|--|------------|--|------------|--|------------|--|------------|--|------------|--|------------|--|------------|--|------------|--|------------|--|------------|--|------------|--|------------|--|------------|--|------------|--|------------|--|------------|--|------------|--|------------|--|------------|--|------------|--|------------|--|------------|--|------------|--|------------|--|------------|--|------------|--|------------|--|------------|--|------------|--|------------|--|------------|--|------------|--|------------|--|------------|--|------------|--|------------|--|------------|--|------------|--|------------|--|------------|--|------------|--|------------|--|------------|--|------------|--|------------|--|------------|--|------------|--|------------|--|------------|--|------------|--|------------|--|------------|--|------------|--|------------|--|------------|--|------------|--|------------|--|------------|--|------------|--|------------|--|------------|--|------------|--|------------|--|------------|--|------------|--|------------|--|------------|--|------------|--|------------|--|------------|--|------------|--|------------|--|------------|--|------------|--|------------|--|------------|--|------------|--|------------|--|------------|--|------------|--|------------|--|------------|--|------------|--|------------|--|------------|--|------------|--|------------|--|------------|--|------------|--|------------|--|------------|--|------------|--|------------|--|------------|--|------------|--|------------|--|------------|--|------------|--|------------|--|------------|--|------------|--|------------|--|------------|--|------------|--|------------|--|------------|--|------------|--|------------|--|------------|--|------------|--|------------|--|------------|--|------------|--|------------|--|------------|--|------------|--|------------|--|------------|--|------------|--|------------|--|------------|--|------------|--|------------|--|------------|--|------------|--|------------|--|------------|--|------------|--|------------|--|------------|--|------------|--|------------|--|------------|--|------------|--|------------|--|------------|--|------------|--|------------|--|------------|--|------------|--|------------|--|------------|--|------------|--|------------|--|------------|--|------------|--|------------|--|------------|--|------------|--|------------|--|------------|--|------------|--|------------|--|------------|--|------------|--|------------|--|------------|--|------------|--|------------|--|------------|--|------------|--|------------|--|------------|--|------------|--|------------|--|------------|--|------------|--|------------|--|------------|--|------------|--|------------|--|------------|--|------------|--|------------|--|------------|--|------------|--|------------|--|------------|--|------------|--|------------|--|------------|--|------------|--|------------|--|------------|--|------------|--|------------|--|------------|--|------------|--|------------|--|------------|--|------------|--|------------|--|------------|--|------------|--|------------|--|------------|--|------------|--|------------|--|------------|--|------------|--|------------|--|------------|--|------------|--|------------|--|------------|--|------------|--|------------|--|------------|--|------------|--|------------|--|------------|--|------------|--|------------|--|------------|--|------------|--|------------|--|------------|--|------------|--|------------|--|------------|--|------------|--|------------|--|------------|--|------------|--|------------|--|------------|--|------------|--|------------|--|------------|--|------------|--|------------|--|------------|--|------------|--|------------|--|------------|--|------------|--|------------|--|------------|--|------------|--|------------|--|------------|--|------------|--|------------|--|------------|--|------------|--|------------|--|------------|--|------------|--|------------|--|------------|--|------------|--|------------|--|------------|--|------------|--|------------|--|------------|--|------------|--|------------|--|------------|--|------------|--|------------|--|------------|--|------------|--|------------|--|------------|--|------------|--|------------|--|------------|--|------------|--|------------|--|------------|--|------------|--|------------|--|------------|--|------------|--|------------|--|------------|--|------------|--|------------|--|------------|--|------------|--|------------|--|------------|--|------------|--|------------|--|------------|--|------------|--|------------|--|------------|--|------------|--|------------|--|------------|--|------------|--|------------|--|------------|--|------------|--|------------|--|------------|--|------------|--|------------|--|------------|--|------------|--|------------|--|------------|--|------------|--|------------|--|------------|--|------------|--|------------|--|------------|--|------------|--|------------|--|------------|--|------------|--|------------|--|------------|--|------------|--|------------|--|------------|--|------------|--|------------|--|------------|--|------------|--|------------|--|------------|--|------------|--|------------|--|------------|--|------------|--|------------|--|------------|--|------------|--|------------|--|------------|--|------------|--|------------|--|------------|--|------------|--|------------|--|------------|--|------------|--|------------|--|------------|--|------------|--|------------|--|------------|--|------------|--|------------|--|------------|--|------------|--|------------|--|------------|--|------------|--|------------|--|------------|--|------------|--|------------|--|------------|--|------------|--|------------|--|------------|--|------------|--|------------|--|------------|--|------------|--|------------|--|------------|--|------------|--|------------|--|------------|--|------------|--|------------|--|------------|--|------------|--|------------|--|------------|--|------------|--|------------|--|------------|--|------------|--|------------|--|------------|--|------------|--|------------|--|------------|--|------------|--|------------|--|------------|--|------------|--|------------|--|------------|--|------------|--|------------|--|------------|--|------------|--|------------|--|------------|--|------------|--|------------|--|------------|--|------------|--|------------|--|------------|--|------------|--|------------|--|------------|--|------------|--|------------|--|------------|--|------------|--|------------|--|------------|--|------------|--|------------|--|------------|--|------------|--|------------|--|------------|--|------------|--|------------|--|------------|--|------------|--|------------|--|------------|--|------------|--|------------|--|------------|--|------------|--|------------|--|------------|--|------------|--|------------|--|------------|--|------------|--|------------|--|------------|--|------------|--|------------|--|------------|--|------------|--|------------|--|------------|--|------------|--|------------|--|------------|--|------------|--|------------|--|------------|--|------------|--|------------|--|------------|--|------------|--|------------|--|------------|--|------------|--|------------|--|------------|--|------------|--|------------|--|------------|--|------------|--|------------|--|------------|--|------------|--|------------|--|------------|--|------------|--|------------|--|------------|--|------------|--|------------|--|------------|--|------------|--|------------|--|------------|--|------------|--|------------|--|------------|--|------------|--|------------|--|------------|--|------------|--|------------|--|------------|--|------------|--|------------|--|------------|--|------------|--|------------|--|------------|--|------------|--|------------|--|------------|--|------------|--|------------|--|------------|--|------------|--|------------|--|------------|--|------------|--|------------|--|------------|--|------------|--|------------|--|------------|--|------------|--|------------|--|------------|--|------------|--|------------|--|------------|--|------------|--|------------|--|------------|--|------------|--|------------|--|------------|--|------------|--|------------|--|------------|--|------------|--|------------|--|------------|--|------------|--|------------|--|------------|--|------------|--|------------|--|------------|--|------------|--|------------|--|------------|--|------------|--|------------|--|------------|--|------------|--|------------|--|------------|--|------------|--|------------|--|------------|--|------------|--|------------|--|------------|--|------------|--|------------|--|------------|--|------------|--|------------|--|------------|--|------------|--|------------|--|------------|--|------------|--|------------|--|------------|--|------------|--|------------|--|------------|--|------------|--|------------|--|------------|--|------------|--|------------|--|------------|--|------------|--|------------|--|------------|--|------------|--|------------|--|------------|--|------------|--|------------|--|------------|--|------------|--|------------|--|------------|--|------------|--|------------|--|------------|--|------------|--|------------|--|------------|--|------------|--|------------|--|------------|--|------------|--|------------|--|------------|--|------------|--|------------|--|------------|--|------------|--|------------|--|------------|--|------------|--|------------|--|------------|--|------------|--|------------|--|------------|--|------------|--|------------|--|------------|--|------------|--|------------|--|------------|--|------------|--|------------|--|------------|--|------------|--|------------|--|------------|--|------------|--|------------|--|------------|--|------------|--|------------|--|------------|--|------------|--|------------|--|------------|--|------------|--|------------|--|------------|--|------------|--|------------|--|------------|--|------------|--|------------|--|------------|--|------------|--|------------|--|------------|--|------------|--|------------|--|------------|--|------------|--|------------|--|------------|--|------------|--|------------|--|------------|--|------------|--|------------|--|------------|--|------------|--|------------|--|------------|--|------------|--|------------|--|------------|--|------------|--|------------|--|------------|--|------------|--|------------|--|------------|--|------------|--|------------|--|------------|--|------------|--|------------|--|------------|--|------------|--|------------|--|------------|--|------------|--|------------|--|------------|--|------------|--|------------|--|------------|--|------------|--|------------|--|------------|--|------------|--|------------|--|------------|--|------------|--|------------|--|------------|--|------------|--|------------|--|------------|--|------------|--|------------|--|------------|--|------------|--|------------|--|------------|--|------------|--|------------|--|------------|--|------------|--|------------|--|------------|--|------------|--|------------|--|------------|--|------------|--|------------|--|------------|--|
|-----------|----------|--|----------|--|----------|--|----------|--|----------|--|----------|--|----------|--|----------|--|----------|--|-----------|--|-----------|--|-----------|--|-----------|--|-----------|--|-----------|--|-----------|--|-----------|--|-----------|--|-----------|--|-----------|--|-----------|--|-----------|--|-----------|--|-----------|--|-----------|--|-----------|--|-----------|--|-----------|--|-----------|--|-----------|--|-----------|--|-----------|--|-----------|--|-----------|--|-----------|--|-----------|--|-----------|--|-----------|--|-----------|--|-----------|--|-----------|--|-----------|--|-----------|--|-----------|--|-----------|--|-----------|--|-----------|--|-----------|--|-----------|--|-----------|--|-----------|--|-----------|--|-----------|--|-----------|--|-----------|--|-----------|--|-----------|--|-----------|--|-----------|--|-----------|--|-----------|--|-----------|--|-----------|--|-----------|--|-----------|--|-----------|--|-----------|--|-----------|--|-----------|--|-----------|--|-----------|--|-----------|--|-----------|--|-----------|--|-----------|--|-----------|--|-----------|--|-----------|--|-----------|--|-----------|--|-----------|--|-----------|--|-----------|--|-----------|--|-----------|--|-----------|--|-----------|--|-----------|--|-----------|--|-----------|--|-----------|--|-----------|--|-----------|--|-----------|--|-----------|--|-----------|--|-----------|--|-----------|--|-----------|--|------------|--|------------|--|------------|--|------------|--|------------|--|------------|--|------------|--|------------|--|------------|--|------------|--|------------|--|------------|--|------------|--|------------|--|------------|--|------------|--|------------|--|------------|--|------------|--|------------|--|------------|--|------------|--|------------|--|------------|--|------------|--|------------|--|------------|--|------------|--|------------|--|------------|--|------------|--|------------|--|------------|--|------------|--|------------|--|------------|--|------------|--|------------|--|------------|--|------------|--|------------|--|------------|--|------------|--|------------|--|------------|--|------------|--|------------|--|------------|--|------------|--|------------|--|------------|--|------------|--|------------|--|------------|--|------------|--|------------|--|------------|--|------------|--|------------|--|------------|--|------------|--|------------|--|------------|--|------------|--|------------|--|------------|--|------------|--|------------|--|------------|--|------------|--|------------|--|------------|--|------------|--|------------|--|------------|--|------------|--|------------|--|------------|--|------------|--|------------|--|------------|--|------------|--|------------|--|------------|--|------------|--|------------|--|------------|--|------------|--|------------|--|------------|--|------------|--|------------|--|------------|--|------------|--|------------|--|------------|--|------------|--|------------|--|------------|--|------------|--|------------|--|------------|--|------------|--|------------|--|------------|--|------------|--|------------|--|------------|--|------------|--|------------|--|------------|--|------------|--|------------|--|------------|--|------------|--|------------|--|------------|--|------------|--|------------|--|------------|--|------------|--|------------|--|------------|--|------------|--|------------|--|------------|--|------------|--|------------|--|------------|--|------------|--|------------|--|------------|--|------------|--|------------|--|------------|--|------------|--|------------|--|------------|--|------------|--|------------|--|------------|--|------------|--|------------|--|------------|--|------------|--|------------|--|------------|--|------------|--|------------|--|------------|--|------------|--|------------|--|------------|--|------------|--|------------|--|------------|--|------------|--|------------|--|------------|--|------------|--|------------|--|------------|--|------------|--|------------|--|------------|--|------------|--|------------|--|------------|--|------------|--|------------|--|------------|--|------------|--|------------|--|------------|--|------------|--|------------|--|------------|--|------------|--|------------|--|------------|--|------------|--|------------|--|------------|--|------------|--|------------|--|------------|--|------------|--|------------|--|------------|--|------------|--|------------|--|------------|--|------------|--|------------|--|------------|--|------------|--|------------|--|------------|--|------------|--|------------|--|------------|--|------------|--|------------|--|------------|--|------------|--|------------|--|------------|--|------------|--|------------|--|------------|--|------------|--|------------|--|------------|--|------------|--|------------|--|------------|--|------------|--|------------|--|------------|--|------------|--|------------|--|------------|--|------------|--|------------|--|------------|--|------------|--|------------|--|------------|--|------------|--|------------|--|------------|--|------------|--|------------|--|------------|--|------------|--|------------|--|------------|--|------------|--|------------|--|------------|--|------------|--|------------|--|------------|--|------------|--|------------|--|------------|--|------------|--|------------|--|------------|--|------------|--|------------|--|------------|--|------------|--|------------|--|------------|--|------------|--|------------|--|------------|--|------------|--|------------|--|------------|--|------------|--|------------|--|------------|--|------------|--|------------|--|------------|--|------------|--|------------|--|------------|--|------------|--|------------|--|------------|--|------------|--|------------|--|------------|--|------------|--|------------|--|------------|--|------------|--|------------|--|------------|--|------------|--|------------|--|------------|--|------------|--|------------|--|------------|--|------------|--|------------|--|------------|--|------------|--|------------|--|------------|--|------------|--|------------|--|------------|--|------------|--|------------|--|------------|--|------------|--|------------|--|------------|--|------------|--|------------|--|------------|--|------------|--|------------|--|------------|--|------------|--|------------|--|------------|--|------------|--|------------|--|------------|--|------------|--|------------|--|------------|--|------------|--|------------|--|------------|--|------------|--|------------|--|------------|--|------------|--|------------|--|------------|--|------------|--|------------|--|------------|--|------------|--|------------|--|------------|--|------------|--|------------|--|------------|--|------------|--|------------|--|------------|--|------------|--|------------|--|------------|--|------------|--|------------|--|------------|--|------------|--|------------|--|------------|--|------------|--|------------|--|------------|--|------------|--|------------|--|------------|--|------------|--|------------|--|------------|--|------------|--|------------|--|------------|--|------------|--|------------|--|------------|--|------------|--|------------|--|------------|--|------------|--|------------|--|------------|--|------------|--|------------|--|------------|--|------------|--|------------|--|------------|--|------------|--|------------|--|------------|--|------------|--|------------|--|------------|--|------------|--|------------|--|------------|--|------------|--|------------|--|------------|--|------------|--|------------|--|------------|--|------------|--|------------|--|------------|--|------------|--|------------|--|------------|--|------------|--|------------|--|------------|--|------------|--|------------|--|------------|--|------------|--|------------|--|------------|--|------------|--|------------|--|------------|--|------------|--|------------|--|------------|--|------------|--|------------|--|------------|--|------------|--|------------|--|------------|--|------------|--|------------|--|------------|--|------------|--|------------|--|------------|--|------------|--|------------|--|------------|--|------------|--|------------|--|------------|--|------------|--|------------|--|------------|--|------------|--|------------|--|------------|--|------------|--|------------|--|------------|--|------------|--|------------|--|------------|--|------------|--|------------|--|------------|--|------------|--|------------|--|------------|--|------------|--|------------|--|------------|--|------------|--|------------|--|------------|--|------------|--|------------|--|------------|--|------------|--|------------|--|------------|--|------------|--|------------|--|------------|--|------------|--|------------|--|------------|--|------------|--|------------|--|------------|--|------------|--|------------|--|------------|--|------------|--|------------|--|------------|--|------------|--|------------|--|------------|--|------------|--|------------|--|------------|--|------------|--|------------|--|------------|--|------------|--|------------|--|------------|--|------------|--|------------|--|------------|--|------------|--|------------|--|------------|--|------------|--|------------|--|------------|--|------------|--|------------|--|------------|--|------------|--|------------|--|------------|--|------------|--|------------|--|------------|--|------------|--|------------|--|------------|--|------------|--|------------|--|------------|--|------------|--|------------|--|------------|--|------------|--|------------|--|------------|--|------------|--|------------|--|------------|--|------------|--|------------|--|------------|--|------------|--|------------|--|------------|--|------------|--|------------|--|------------|--|------------|--|------------|--|------------|--|------------|--|------------|--|------------|--|------------|--|------------|--|------------|--|------------|--|------------|--|------------|--|------------|--|------------|--|------------|--|------------|--|------------|--|------------|--|------------|--|------------|--|------------|--|------------|--|------------|--|------------|--|------------|--|------------|--|------------|--|------------|--|------------|--|------------|--|------------|--|------------|--|------------|--|------------|--|------------|--|------------|--|------------|--|------------|--|------------|--|------------|--|------------|--|------------|--|------------|--|------------|--|------------|--|------------|--|------------|--|------------|--|------------|--|------------|--|------------|--|------------|--|------------|--|------------|--|------------|--|------------|--|------------|--|------------|--|------------|--|------------|--|------------|--|------------|--|------------|--|------------|--|------------|--|------------|--|------------|--|------------|--|------------|--|------------|--|------------|--|------------|--|------------|--|------------|--|------------|--|------------|--|------------|--|------------|--|------------|--|------------|--|------------|--|------------|--|------------|--|------------|--|------------|--|------------|--|------------|--|------------|--|------------|--|------------|--|------------|--|------------|--|------------|--|------------|--|------------|--|------------|--|------------|--|------------|--|------------|--|------------|--|------------|--|------------|--|------------|--|------------|--|------------|--|------------|--|------------|--|------------|--|------------|--|------------|--|------------|--|------------|--|------------|--|------------|--|------------|--|------------|--|------------|--|------------|--|------------|--|------------|--|------------|--|------------|--|------------|--|------------|--|------------|--|------------|--|------------|--|------------|--|------------|--|------------|--|------------|--|------------|--|------------|--|------------|--|------------|--|------------|--|------------|--|------------|--|------------|--|------------|--|------------|--|------------|--|------------|--|------------|--|------------|--|------------|--|------------|--|------------|--|------------|--|------------|--|------------|--|------------|--|------------|--|------------|--|------------|--|------------|--|------------|--|------------|--|------------|--|------------|--|------------|--|------------|--|------------|--|------------|--|------------|--|------------|--|------------|--|------------|--|------------|--|------------|--|------------|--|------------|--|------------|--|------------|--|------------|--|------------|--|------------|--|------------|--|------------|--|------------|--|------------|--|------------|--|------------|--|------------|--|------------|--|------------|--|------------|--|------------|--|------------|--|------------|--|------------|--|------------|--|------------|--|------------|--|------------|--|------------|--|------------|--|------------|--|------------|--|------------|--|------------|--|------------|--|------------|--|------------|--|------------|--|------------|--|------------|--|------------|--|------------|--|------------|--|------------|--|------------|--|------------|--|------------|--|------------|--|------------|--|------------|--|------------|--|------------|--|------------|--|------------|--|------------|--|------------|--|------------|--|------------|--|------------|--|------------|--|------------|--|------------|--|------------|--|------------|--|------------|--|------------|--|------------|--|------------|--|------------|--|------------|--|------------|--|------------|--|------------|--|------------|--|------------|--|------------|--|------------|--|------------|--|------------|--|------------|--|------------|--|------------|--|------------|--|------------|--|------------|--|------------|--|------------|--|------------|--|------------|--|------------|--|------------|--|------------|--|------------|--|------------|--|------------|--|------------|--|------------|--|
