# Supplementary figures and images for: Sustained YAP1 activation induces DNA demethylation that promotes the development of hepatocellular carcinomas lacking driver gene mutations
Source: Research Square preprint supplement (doi:10.21203/rs.3.rs-7250110/v1), 2025-08-22

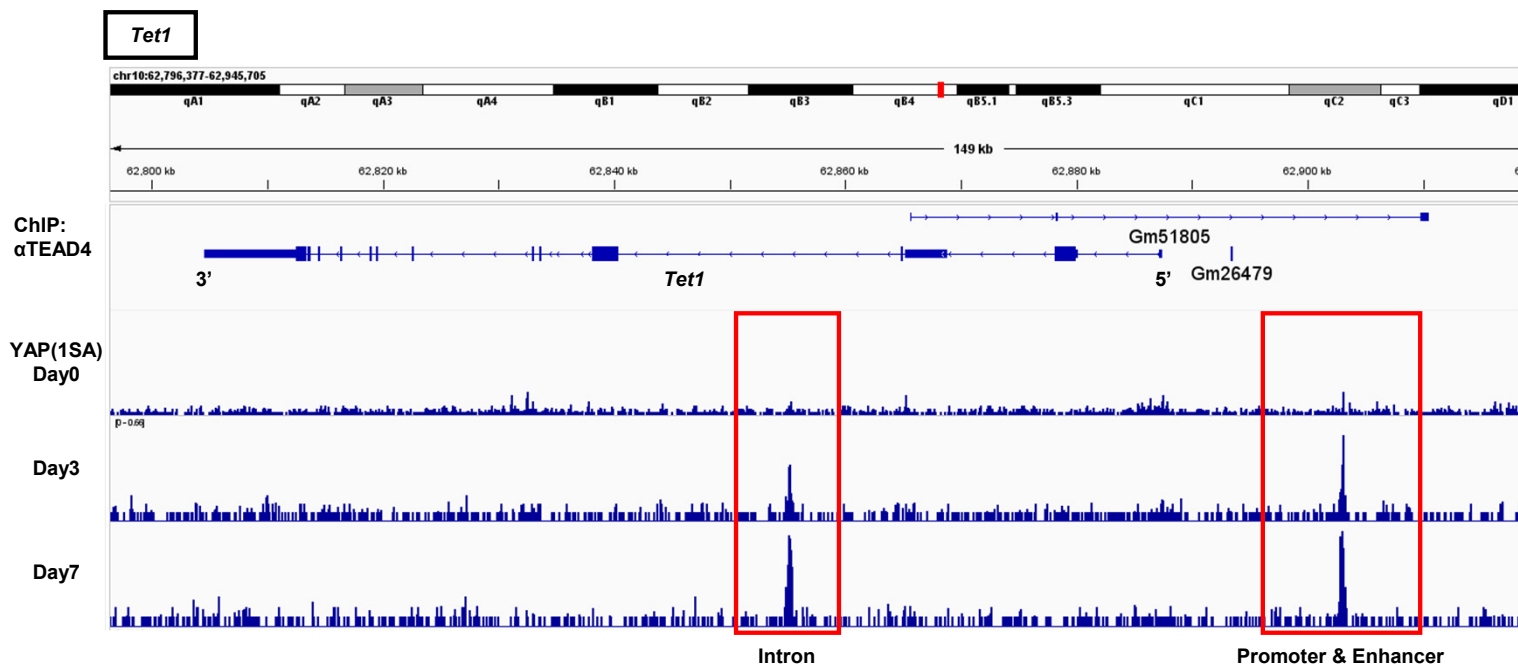

Supplementary Figure 1

Supplement: Supplementary file 4 [file d789a304963c24054b8b92d9.pdf]

a

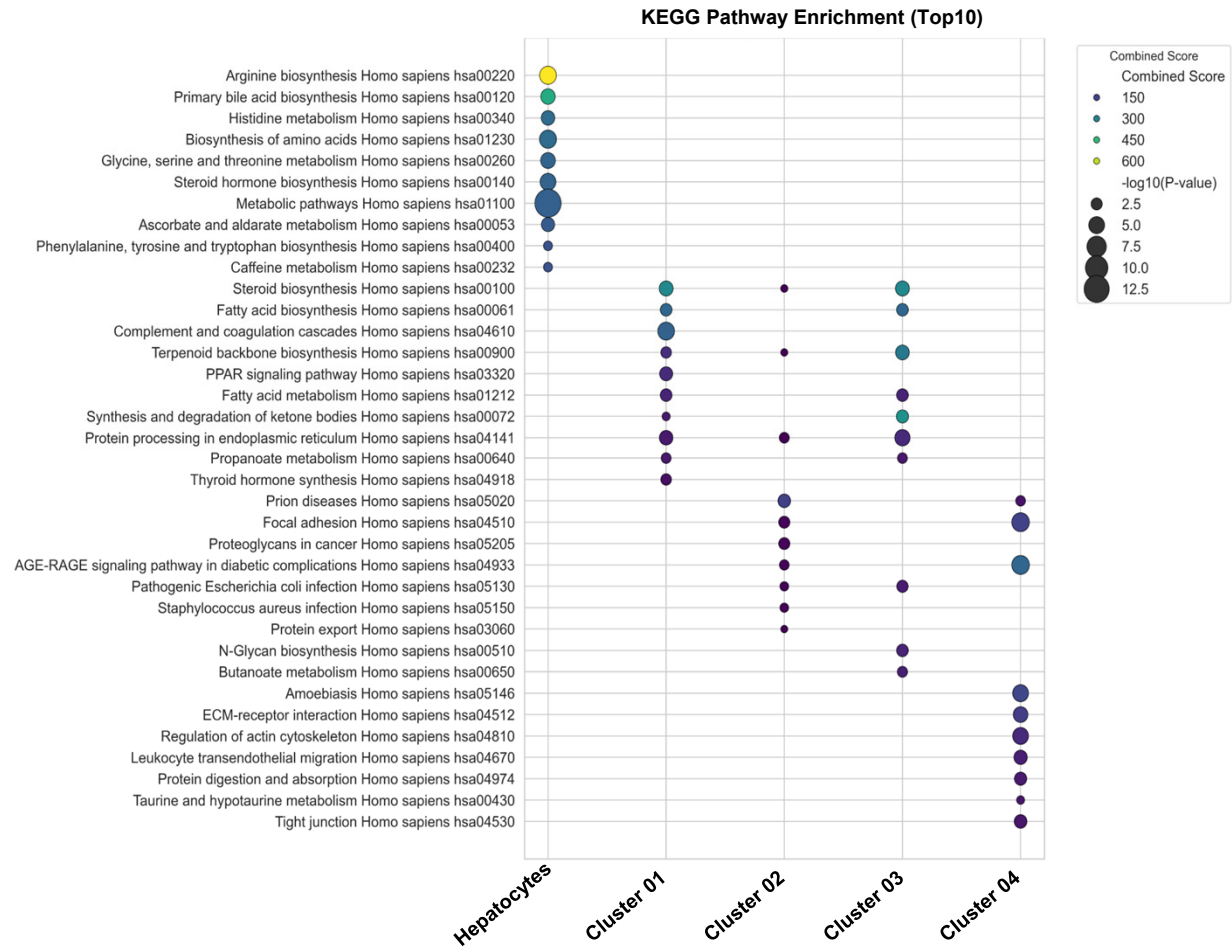

b

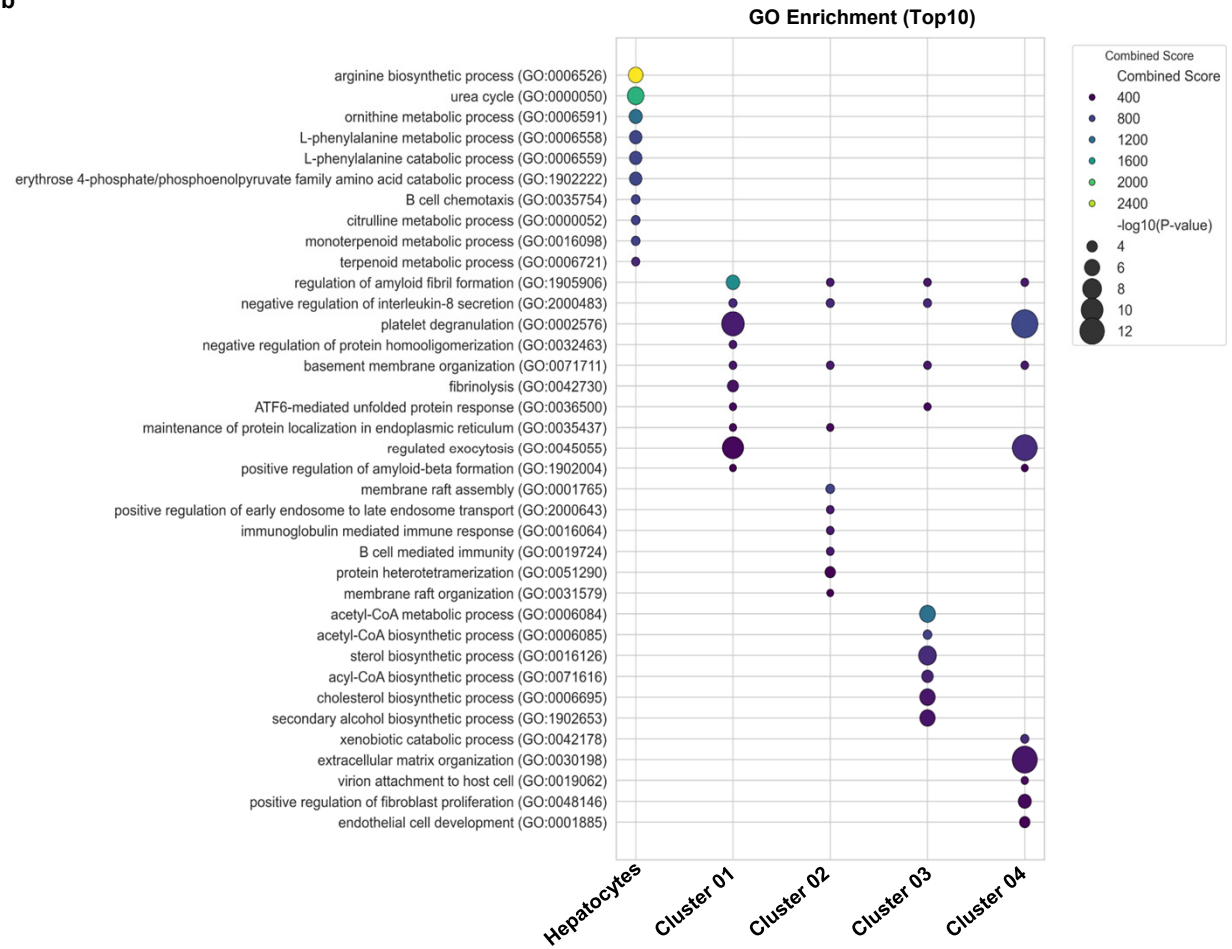

Supplementary Figure 5

Supplement: Supplementary file 5 [file fe00d845d73df762e461885d.pdf]
